# Supplementary material
Source: publisher site journal article supplement (https://www.dovepress.com/get_supplementary_file.php?f=288196.docx)
Supplement: Supplementary file 1 [file get_supplementary_file.php]

# Appendix 1: Methodological approach followed for the single statements

| **Statements taken from the review of guidelines analysed** |
| --- |
| Acupuncture  Patellar taping  Hydrokinesitherapy  Avocado soybean unsaponifiables  Intra-articular growth factor/protein-rich plasma  Oral NSAIDs  Opioids  Paracetamol  Topical preparations  Walking aids  Braces, foot orthoses  Education and life style  Arthroscopic surgery  Management and follow up |
| **Operations subjected to review/in-depth analysis** |
| Physical agents  Therapeutic physical exercise  Balneotherapy  Intra-articular hyaluronic acid  Glucosamine  Chondroitin  Diacerein  Indications for surgery  Chondroprotection and magnetic resonance imaging  Vitamin D |
| **Operations not treated** |
| Dietary supplements  Free-floating (un-fixed) interpositional device  Psychosocial operations  Duloxetine  Biphosphonates |

# Appendix 2

**Search criteria, strings and flows**

The search criteria were agreed upon with the members of the board at the meeting of 5 March 2019 and are summarized in the PICOS (Table S 1) below.

| **Patients** | Patients with a diagnosis of idiopathic or secondary knee osteoarthritis (+/- involvement of other regions), any Kellgren and Lawrence grade +/- other comorbidities. Age >18 years. |
| --- | --- |
| **Operations** | Defined during the discussion |
| **Comparisons** | Any |
| **Outcomes** | pain, function, quality of life (QoL) |
| **Studies** | meta-analysis, systematic reviews.  If no MA/SR available: trial with at least 100 patients with knee OA for each arm.  Date of publication: from 01/01/2017 to 14/03/2019 |

Table S 1: PICOS

The search strings and selection flows used to select the literature review for the following treatments are indicated: intra-articular injections of hyaluronic acid (Table S 2, Figure S 1), diacerein (Table S 3, Figure S 2), glucosamine and chondroitin (Table S 4, Figure S 3) and indications for surgery (Table S 5 ,Figure S 4).

Furthermore, in order to select the most important papers, the articles published in journals with an impact factor (IF) included in the upper quartile of the entire list of results obtained from each string were included (Appendix 3, Tables S 6, S 7, S 8, S 9).

Table S 2. Intra-articular hyaluronic acid – search strings

| **Intra-articular hyaluronic acid** | |
| --- | --- |
| **PubMed** | ("Osteoarthritis, Knee"[Mesh] OR "knee arthrosis"[tiab] OR "knee osteoarthritis"[tiab] OR knee osteoarthritis[tiab] OR gonarthritis[tiab] OR gonitis[tiab]) AND ("Hyaluronic Acid"[Mesh] OR "Viscosupplementation"[Mesh] OR 'viscosupplementation'[tiab] OR hyaluronic[tiab] OR hyaluronate*[tiab] OR hyaluronan*[tiab]) AND (systematic[sb] OR Meta-Analysis[ptyp]) AND ("2017/01/01"[PDat]: "2019/03/14"[PDat]) |
| **EMBASE** | (gonitis:ti,ab,kw OR gonarthritis:ti,ab,kw OR knee osteoarthritis:ti,ab,kw OR 'knee arthrosis':ti,ab,kw OR 'knee osteoarthritis'/exp OR 'knee osteoarthritis':ti,ab,kw) AND ('viscosupplementation':ti,ab,kw OR hyaluronic:ti,ab,kw OR hyaluronate*:ti,ab,kw OR hyaluronan*:ti,ab,kw) AND (2017:py OR 2018:py OR 2019:py) AND ('meta-analysis'/de OR 'systematic review'/de) |
| **Cochrane** | #1: "knee arthrosis":ti,ab,kw OR "knee osteoarthritis":ti,ab,kw OR knee osteoarthritis:ti,ab,kw OR gonarthritis:ti,ab,kw OR gonitis:ti,ab,kw  #2: MeSH descriptor: [Osteoarthritis, Knee] explode all trees  #3: #1 OR #2  #4: 'Viscosupplementation':ti,ab,kw OR 'viscosupplementation':ti,ab,kw OR hyaluronic:ti,ab,kw OR hyaluronate*:ti,ab,kw OR hyaluronan*:ti,ab,kw  #5: MeSH descriptor: [Hyaluronic Acid] explode all trees  #6: MeSH descriptor: [Viscosupplementation] explode all trees  #7: #4 OR #5 OR #6  #8: #3 AND #7 with Publication Year from 2017 to 2019, with Cochrane Library publication date Between Jan 2017 and Mar 2019 |

Figure S 1. Intra-articular hyaluronic acid – Selection process

Results: 62 studies

43

Duplicates: 19

16

Screening by title, abstract and full text: 27

4

Exclusion for IF: 12

Table S 3. Diacerein – search strings

| **Diacerein** | |
| --- | --- |
| **PubMed** | ("Osteoarthritis, Knee"[Mesh] OR "knee arthrosis"[tiab] OR "knee osteoarthritis"[tiab] OR knee osteoarthritis[tiab] OR gonarthritis[tiab] OR gonitis[tiab]) AND ("diacetylrhein"[Supplementary Concept] OR "diacerein"[tiab] OR "diacetylrhein"[tiab]) Filters: Systematic Reviews; Meta-Analysis; Publication date from 2017/01/01 to 2019/03/14 |
| **EMBASE** | (gonitis: ti,ab,kw OR gonarthritis:ti,ab,kw OR knee osteoarthritis:ti,ab,kw OR 'knee arthrosis':ti,ab, kw OR 'knee osteoarthritis'/exp OR 'knee osteoarthritis':ti,ab,kw) AND ('diacerein’: ti,ab,kw OR 'diacerein'/exp)  AND ('meta-analysis'/de OR 'systematic review'/de) AND (2017:py OR 2018:py) |
| **Cochrane** | #1: "knee arthrosis”: ti,ab,kw OR "knee osteoarthritis":ti,ab,kw OR knee osteoarthritis:ti,ab,kw OR gonarthritis:ti,ab,kw OR gonitis:ti,ab,kw  #2: MeSH descriptor: [Osteoarthritis, Knee] explode all trees  #3: #1 OR #2  #4: "diacerein”: ti,ab,kw OR "diacetylrhein":ti,ab,kw  #5: #3 AND #4 with Publication Year from 2017 to 2019, with Cochrane Library publication date Between Jan 2017 and Mar 2019 |

Results: 5 studies

4

Duplicates: 1

2

Screening by title, abstract and full text: 2

1

Exclusion for IF: 1

Figure S 2. Diacerein – Selection process

Table S 4. Glucosamine/chondroitin – search strings

| **Glucosamine/Chondroitin** | |
| --- | --- |
| **PubMed** | (("knee arthrosis"[tiab] OR "knee osteoarthritis"[tiab] OR knee osteoarthritis[tiab] OR gonarthritis[tiab] OR gonitis[tiab] OR "Osteoarthritis, Knee"[Mesh])  AND ("Chondroitin"[Mesh] OR chondroitin[tiab] OR glucosamine[tiab] OR acetylglucosamine[tiab] OR acetyl‐glucosamine[tiab] OR "glucosamine sulfate"[tiab] OR "glucosamine hydrochloride"[tiab] OR "Glucosamine"[Mesh])) Filters: Systematic Reviews; Meta-Analysis; Publication date from 2017/01/01 to 2019/03/14 |
| **EMBASE** | (gonitis:ti,ab,kw OR gonarthritis:ti,ab,kw OR knee osteoarthritis:ti,ab,kw OR 'knee arthrosis':ti,ab,kw OR 'knee osteoarthritis':ti,ab,kw OR 'knee osteoarthritis'/exp) AND ('glucosamine'/exp OR 'glucosamine sulfate'/exp OR 'n acetylglucosamine'/exp OR glucosamine:ti,ab,kw OR 'glucosamine sulfate':ti,ab,kw OR acetylglucosamine:ti,ab,kw OR 'acetyl-glucosamine':ti,ab,kw OR 'chondroitin'/exp OR chondroitin:ti,ab,kw) AND ('meta-analysis'/de OR 'systematic review'/de) AND (2017:py OR 2018:py OR 2019:py) |
| **Cochrane** | #1 "knee arthrosis":ti,ab,kw OR "knee osteoarthritis":ti,ab,kw OR knee osteoarthritis:ti,ab,kw OR gonarthritis:ti,ab,kw OR gonitis:ti,ab,kw  #2 MeSH descriptor: [Osteoarthritis, Knee] explode all trees  #3 #1 OR #2  #4 chondroitin:ti,ab OR glucosamine:ti,ab OR acetylglucosamine:ti,ab OR acetyl‐glucosamine:ti,ab OR "glucosamine sulfate":ti,ab OR "glucosamine hydrochloride":ti,ab  #5 MeSH descriptor: [Glucosamine] explode all trees  #6 MeSH descriptor: [Chondroitin] explode all trees  #7 #4 OR #5 OR #6  #8 #3 AND #7 with Publication Year from 2017 to 2019, with Cochrane Library publication date Between Jan 2017 and Mar 2019 |

Figure S 3. Glucosamine/chondroitin – Selection process

Results: 34 studies

24

Duplicates: 10

15

Screening by title, abstract and full text: 9

3

Exclusion for IF: 12

2 chondroitin and glucosamine studies, 1 glucosamine only study

Table S 5. Indications for surgery – search string

| **Indications for conservative surgery** | |
| --- | --- |
| **PubMed** | ("Osteoarthritis, Knee"[Mesh] OR gonitis[tiab] OR gonarthritis[tiab] OR knee osteoarthritis[tiab] OR "Knee osteoarthritis"[tiab] OR "knee arthrosis"[tiab]) AND ("Arthroplasty, Replacement, Knee"[Mesh] OR "arthroplasty"[tiab] OR "knee arthroplasty" [tiab] OR "total knee arthroplasty" [tiab]) AND ("indication*"[tiab] OR "criteria"[tiab] OR referral[tiab] OR "decision tree*"[tiab] OR "criteria"[ti] OR "elegibility"[ti] OR elegible[tiab] OR "surgical timing"[tiab] OR "decision making"[tiab] OR "Patient Care Management"[Mesh] OR "Referral and Consultation"[Mesh] OR "Patient Care Planning"[Mesh] OR "Decision Trees"[Mesh] OR "Decision Making"[Mesh])  Filters: Systematic Reviews; Meta-Analysis; Publication date from 2017/01/01 to 2019/03/14 |
| **EMBASE** | (gonitis:ti,ab,kw OR gonarthritis:ti,ab,kw OR knee osteoarthritis:ti,ab,kw OR 'knee arthrosis':ti,ab,kw OR 'knee osteoarthritis'/exp OR 'knee osteoarthritis' OR 'knee osteoarthritis':ti,ab,kw) AND ('total knee arthroplasty'/exp OR 'knee arthroplasty':ti,ab,kw OR 'total knee arthroplasty':ti,ab,kw) AND ('indication*':ti,ab,kw OR referral:ti,ab,kw OR 'decision tree*':ti,ab,kw OR 'criteria':ti,ab,kw OR 'elegibility':ti,ab,kw OR elegible:ti,ab,kw OR 'surgical timing':ti,ab,kw OR 'decision making':ti,ab,kw OR 'decision making'/exp OR 'patient referral'/exp OR 'surgical timing'/exp OR 'patient care planning'/exp OR 'decision tree'/exp) AND (2017:py OR 2018:py OR 2019:py) AND 'review'/it |
| **Cochrane** | #1 MeSH descriptor: [Patient Care Management] explode all trees  #2 MeSH descriptor: [Decision Making] explode all trees  #3 MeSH descriptor: [Referral and Consultation] explode all trees  #4 MeSH descriptor: [Patient Selection] explode all trees  #5 MeSH descriptor: [Decision Trees] explode all trees  #6 referral:ti,ab  #7 "surgical timing":ti,ab  #8 "decision making":ti,ab  #9 "decision tree*":ti,ab  #10 "elegibility":ti,ab  #11 "elegible":ti,ab  #12 "criteria":ti,ab  #13 "indications":ti,ab  #14 #1 OR #2 OR #3 OR #4 OR #5 OR #6 OR #7 OR #8 OR #9 OR #10 OR #12 OR #13  #15 MeSH descriptor: [Osteoarthritis, Knee] explode all trees  #16 gonitis:ti,ab OR gonarthritis:ti,ab OR gonarthros*:ti,ab OR "knee osteoarthritis":ti,ab OR "knee arthrosis":ti,ab  #17 MeSH descriptor: [Arthroplasty, Replacement, Knee] explode all trees  #18 "arthroplasty":ti,ab OR "knee arthroplasty":ti,ab OR "total knee arthroplasty":ti,ab  #19 #17 OR #18  #20 #15 OR #16  #21 #20 AND #14 AND #19 with Publication Year from 2017 to 2019, with Cochrane Library publication date Between Jan 2017 and Mar 2019 |

Figure S 4. Indications for conservative surgery – Selection process

Results: 53 studies

43

Duplicates: 10

1

Screening by title, abstract and full text: 42

1

Exclusion for IF: 0

The experts in the field involved in drawing up the document suggested the inclusion of additional sources (Schmitt 201764, Gademan 201665) containing information considered important in drawing up the recommendation.

# Appendix 3

Studies considered in updating the recommendations of hyaluronic acid, glucosamine, diacerein, and chondroitin.

## Hyaluronic acid

**Sources considered:** Altman R. et al 201834; Bhandari et al. 2017 32; Gregori D. et al 201828; [Vannabouathong C](https://www.ncbi.nlm.nih.gov/pubmed/?term=Vannabouathong%20C%5BAuthor%5D&cauthor=true&cauthor_uid=30020117) et al. 201833.

Table S 6. Hyaluronic acid: considered sources

| Pain in the short term (up to 26 weeks) | | |
| --- | --- | --- |
| Study ref. | Type | Results |
| Bhandari. 2017 32 | Systematic review of MAs | “Our independent review of recent evidence indicates that IAHA therapy is well tolerated, with **significantly improved pain**, function and stiffness outcomes compared with placebo or noninterventional controls in patients with mild-to-moderate knee OA up to 26 weeks.” |
| Pain in the long term (≥12 months) | | |
| Study ref. | Type | SMD results (CrI 95%) |
| Gregori. 201828 | Network meta-analysis | All trials -0.06 (-0.18 to 0.06)*  Excluding trials with high risk of bias -0.05 (-0.18 to 0.07)* |
| Function in the short term (up to 26 weeks) | | |
| Study ref. | Type | Results |
| Bhandari. 2017 32 | Systematic review of MAs | “Our independent review of recent evidence indicates that IAHA therapy is well tolerated, with significantly improved pain, **function** and stiffness outcomes compared with placebo or noninterventional controls in patients with mild-to-moderate knee OA up to 26 weeks.” |
| Influence of molecular weight on pain | | |
| Study ref. | Type | SMD results (CI 95%) |
| Vannabouathong. 2018 33 | Systematic review of MAs | ≥ 6,000 kDa: 0.58 (0.36 to 0.79) Possibly clinically important  ≥1,500 to <6,000 kDa: 0.55 (0.30 to 0.80) Possibly clinically important  >1,500 kDa: 0.23 (0.13 to 0.33) Not clinically important |
| Bhandari. 2017 32 | Systematic review of MAs | “Among studies reporting SE, higher MW HA demonstrated a statistically significant improvement in pain outcomes compared with lower MW HA.” |
| Repeated infiltrations | | |
| Study ref. | Type | Results |
| Altman. 201834 | Systematic review | The current review summarizes the limited published evidence on repeated courses of IA-HA treatment for knee OA and found that repeated injections of IA-HA reduced pain and were a safe therapeutic option. These results were demonstrated within investigations of a single repeat course and courses of two or more reinjection cycles. Significant improvement in pain from baseline to the final follow-up was reported in all studies. In RCTs with extension studies, a continued reduction in pain was also observed for participants who received additional courses of treatment |
| Adverse events - any | | |
| Study ref. | Type | Results |
| Bhandari. 2017 32 | Systematic review of MAs | Concerns regarding the quality of safety data reporting with IAHA therapy were noted and available data suggests that IAHA therapy is relatively well tolerated, with no significantly increased risk of any AEs compared with placebo. |

*An SMD of 0.20 is considered a small difference between the experimental and the control group; 0.50, a moderate difference; and 0.80, a large difference.

## Diacerein

**Sources considered:** Liu X. et al. 201829

Table S 7. Diacerein: considered sources

| Pain | | |
| --- | --- | --- |
| Study ref. | Type | SMD results (CI 95%) |
| Liu. 201829 | meta-analysis | Short term (≤3 months): -0.44 (-0.63 to -0.24)§  Medium term (4-6 months): -0.25 (-0.46 to -0.05)§  Long term (>6 months): 0.00 (-0.18 to 0.18)§ |
| Function | | |
| Study ref. | Type | SMD results (CI 95%) |
| Liu. 201829 | meta-analysis | Short term (≤3 months): -0.35 (-0.54 to -0.16)§  Medium term (4-6 months): -0.24 (-0.44 to -0.03)§  Long term (>6 months): 0.00 (-0.18 to 0.18)§ |
| Adverse events - any (compared to placebo) | | |
| Study ref. | Type | Risk Ratio results (CI 95%) |
| Liu. 201829 | meta-analysis | 1.3 (1.1 to 1.6)§ |

§ effect size up to 0.3 considered as small, between 0.3 and 0.8 as moderate, and greater than 0.8 as large effects. A threshold of 0.37 standardised units was defined as the minimum clinically important difference (MCID).

## Glucosamine

**Sources considered:** Gregori D. et al. 201828; Liu X. et al. 201829; Runhaar J. et al. 201730

Table S 8. Glucosamine: considered sources

| Pain in the short-medium term | | |
| --- | --- | --- |
| Study ref. | Type | SMD results (CI 95%) |
| Liu.201829 | meta-analysis | Short term (≤3 months) -0.28 (-0.52 to -0.04) §  Medium term (4-6 months) -0.01 (-0.22 to 0.19) § |
| Runhaar. 201730 | meta-analysis | Up to 6 months: -0.03 (-0.15 to 0.09)  Estimated pooled differences (CI 95%) (positive result in favour of glucosamine)  Only for studies with knee OA: 0.91 (-1.91 to 3.75)  Glucosamine hydrochloride in knee OA: 0.98 (-1.94 to 3.91)  Glucosamine sulfate in knee OA 0.59 (-11.79 to 12.98) |
| Pain in the long term (>6 months) | | |
| Study ref. | Type | SMD results (CrI - CI 95%) |
| Gregori. 201828 | network meta-analysis | All trials (≥12 months)  Glucosamine sulfate -0.29 (-0.49 to -0.09)*  Other glucosamines -0.11 (-0.26 to 0.04)*  Glucosamines + chondroitin sulfate -0.13 (-0.29 to 0.03)*  Exclusion of studies with high risk of bias  Glucosamine sulfate -0.29 (-0.49 to -0.10)*  Other glucosamines -0.07 (-0.23 to 0.08)*  Glucosamines+chondroitin sulfate -0.11 (-0.27 to 0.05)* |
| Liu.201829 | meta-analysis | Long term (>6 months) -0.17 (-0.30 to -0.04) § |
| Runhaar. 201730 | meta-analysis | 24 months: -0.04 (-0.18 to 0.10)  Estimated pooled differences (95% CI) (positive result in favour of glucosamine)  Only for studies with knee OA: 0.19 (−2.83 to 3.22)  Glucosamine hydrochloride in knee OA: 0.78 (-4.33 to 5.89)  Glucosamine sulfate in knee OA: -0.38 (-3.67 to 2.90) |
| Function in the short-medium term | | |
| Study ref. | Type | SMD results (CI 95%) |
| Liu.201829 | meta-analysis | Short term (≤3 months) -0.45(-0.73 to -0.17) §  Medium term SMD (4-6 months) -0.03 (-0.28 to 0.21) § |
| Runhaar. 201730 | meta-analysis | Estimated pooled differences and 95% CI  (positive result in favour of glucosamine)  Only for knee OA studies: 1.80 (−0.81 to 4.04)  Glucosamine hydrochloride 1.92 (−0.77 to 4.61)  Glucosamine sulfate in knee OA −0.39 (−10.88 to 10.09) |
| Function in the long term | | |
| Study ref. | Type | SMD results (CrI - CI 95%) |
| Gregori. 201828 | network meta-analysis | All the trials (≥12 months)  Glucosamine sulfate -0.32 (-0.52 to -0.12)*  Other glucosamines -0.04 (-0.20 to 0.12)*  Glucosamines + chondroitin sulfate -0.02 (-0.19 to 0.15)* |
| Liu.201829 | meta-analysis | Long term (>6 months) -0.17 (-0.34 to 0.0) § |
| Runhaar. 201730 | meta-analysis | Estimated pooled differences and 95% CI  (positive result in favour of glucosamine)  Only knee OA studies: 0.63 (−2.31 to 3.58)  Glucosamine hydrochloride: 0.85 (-4.43 to 6.13)  Glucosamine sulfate in knee OA: 0.62 (−2.29 to 3.52) |
| Adverse events – any (compared to placebo) | | |
| Study ref. | Type | Risk Ratio results (CI 95%) |
| Liu.201829 | meta-analysis | 1.0 (0.9 to 1.1) § |

§ effect size up to 0.3 considered as small, between 0.3 and 0.8 as moderate, and greater than 0.8 as large effects. A threshold of 0.37 standardised units was defined as the minimum clinically important difference (MCID).

*An SMD of 0.20 is considered a small difference between the experimental and the control group; 0.50, a moderate difference; and 0.80, a large difference.

## Chondroitin

**Sources considered:** Gregori D. et al 201828; Liu X. et al. 201829

Table S 9. Chondroitin: considered sources

| Pain in the short-medium term | | |
| --- | --- | --- |
| Study ref. | Type | SMD results (CI 95%) |
| Liu.201829 | meta-analysis | Short term (≤3 months): -0.34 (-0.49 to -0.19) §  Medium term (4-6 months): -0.26 (-0.47 to -0.05) § |
| Pain in the long term | | |
| Study ref. | Type | SMD results (CrI - CI 95%) |
| Gregori. 201828 | network meta-analysis | All trials (≥12 months) -0.06 (-0.17 to 0.05)  Excluding trials with a high risk of bias (≥12 months) -0.05 (-0.16 to 0.06)* |
| Liu.201829 | meta-analysis | >6 months: -0.18 (-0.41 to 0.05) § |
| Function in the short term | | |
| Study ref. | Type | SMD results (CI 95%) |
| Liu.201829 | meta-analysis | Short term (≤3 months): -0.36 (-0.58 to -0.13) §  Medium term (4-6 months): -0.22 (-0.42 to -0.01) § |
| Function in the long term | | |
| Ref.Studio | Type | SMD results (CrI – CI 95%) |
| Gregori. 201828 | network meta-analysis | All trials (≥12 months): -0.03 (-0.20 to 0.14)* |
| Liu.201829 | meta-analysis | >6 months: -0.34 (-1.06 to 0.39) § |
| Adverse events - any (compared to placebo) | | |
| Study ref. | Type | Risk Ratio results (CI 95%) |
| Liu.201829 | meta-analysis | 1.1 (0.9 to 1.4) § |

§ effect size up to 0.3 considered as small, between 0.3 and 0.8 as moderate, and greater than 0.8 as large effects. A threshold of 0.37 standardised units was defined as the minimum clinically important difference (MCID).

* An SMD of 0.20 is considered a small difference between the experimental and the control group; 0.50, a moderate difference; and 0.80, a large difference.
